# Supplementary material for: <strong>Deletion in the Bardet-Biedl Syndrome Gene <em>TTC8</em> Results in a Syndromic Retinal Degeneration in Dogs</strong>
Source: Preprints.org preprint supplement (doi:10.20944/preprints202008.0584.v1), 2020-08-26
Supplement: Supplementary file 1 [file supplementary]

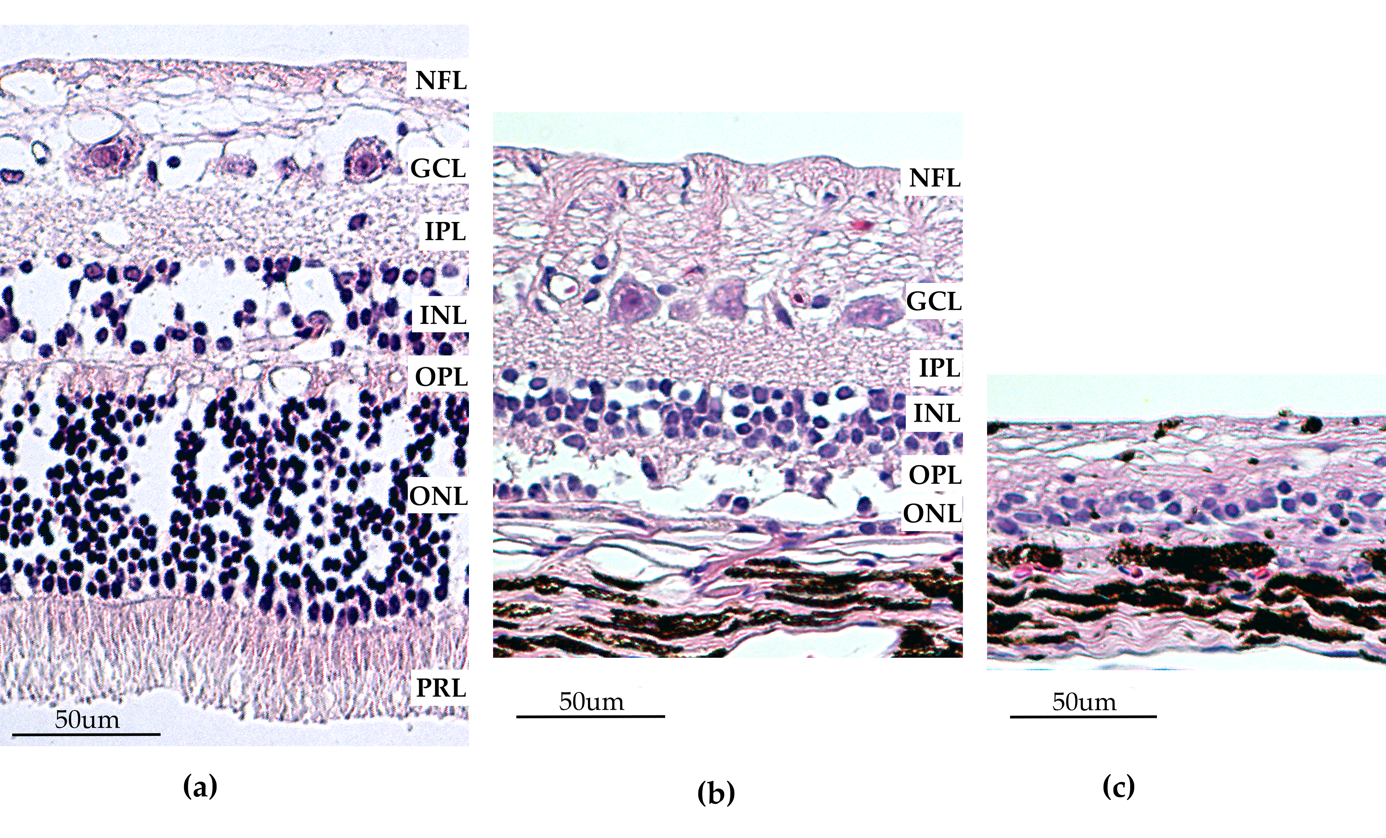


**Figure S1**. Retinal changes associated with *TTC8*delA. (**a**) Photomicrograph of tapetal fundus from an unaffected 3-year old Rottweiler (RW01) (**b**) Photomicrograph of tapetal fundus of the 6-year old affected male (GR01) showing loss of photoreceptor outer and inner segments and severe thinning of the ONL. (**c**) Photomicrograph of non-tapetal fundus from the affected male (GR01) with severe retinal degeneration and complete loss of architecture. Layers of the retina: NFL: nerve fiber layer, GCL: ganglion cell layer, IPL: inner plexiform layer, INL: inner nuclear layer, OPL: outer plexiform layer, ONL: outer nuclear layer, PRL: photoreceptor outer and inner segments.
