# Supplementary material for: <strong>Deletion in the Bardet-Biedl Syndrome Gene <em>TTC8</em> Results in a Syndromic Retinal Degeneration in Dogs</strong>
Source: Preprints.org preprint supplement (doi:10.20944/preprints202008.0584.v1), 2020-08-26
Supplement: Supplementary file 3 [file Mäkeläinen_Supplementary_tables_S1-S6.xlsx]

## Sheet: Table S1
Table S1. Primary and secondary characteristics.
		PRIMARY CHARACTERISTICS							SECONDARY CHARACTERISTICS
DogID	Gender	Retinal degeneration	Renal anomalies	Intellectual disability	Polydactyly	Reproductive problems	Obesity	Count of primary characteristics	Size according to FCI-breed standard	Anosmia	Behavioural or social problems	Fur, coat, nails	Eye anomalies	Distinctive facial features	Dental abnormalities	Sinus invertus	Heart problems	Other	Count of secondary characteristics
GR01	Male	4yr 3months#	Renal anomaly-like lesion, right kidney#	No signs	No#	Hypogonadism#, abnormal sperm#, not interested in females	Body condition score consistent with obesity. Ate everything (mushrooms etc)	4	34.5kg, short for the breed, solidly built	Poor sense of smell	N/A	Curly, rough coat	Cataract#, iridociliary cysts#	Broadened muzzle and flat forehead#	Gingival hyperplasia, diastema in both lower and upper jaw#	No#	No#	Hypothyroidism	7
GR02	Female	4yr 6months#	Chronic glomerulonephritis bilaterally#	No signs	No#	No heats before age of 2, after which neutered because living with male dogs	Body condition score consistent with heavy. Ate everything (mushrooms etc)	4	28kg	Poor sense of smell	N/A	Curly, rough coat	Cataract#	Curved nose	Diastema#	No#	No#	N/A	4
GR03	Male	6yr	N/A	No, learned new things easily	N/A	Very big testicles	Heavy, had good appetite	2	40kg, short for the breed, solidly built	No sense of smell	Urinated inside sometimes	Problems with coat and nails	N/A	N/A	N/A	N/A	N/A	N/A	3
GR04	Female	5yr	Kidney failure diagnosed by a veterinarian	N/A	N/A	Had only been in heat twice at the age of 6	Ate everything, such as candle, tree bark, roadside chewing gums, mushrooms	3	23.5kg	Slightly abnormal	Did not warn other dogs, could attack them without warning	N/A	Cataract	N/A	N/A	N/A	N/A	N/A	3
GR05	Male	6yr 6months	N/A	N/A	N/A	Was not interested in females	Very interested in food and later got a little overweigh	2	Middle sized	Slightly abnormal	N/A	Long curly coat	Cataract	N/A	N/A	N/A	N/A	N/A	3
GR06	Male	4yr 6months	N/A	No, learned easily and friendly	N/A	Cryptorchidism. Had only little contact with females but was not very interested	Slightly overweight, always hungry.	3	N/A	Slightly abnormal	N/A	Curly coat	Cataract	N/A	N/A	N/A	N/A	N/A	3
GR07	Female	4yr 6months	High liver and kidney values with unknown reason	Mentally challenced according to owner	N/A	Pyometra after first heat, after which castrated	Obese, on weight-controlling diet	4	24kg	Poor sense of smell	Urinated inside sometimes, independent	N/A	N/A	N/A	N/A	N/A	N/A	N/A	2
GR08*	Male	2yr 9months	N/A	No, was able to learn new things	N/A	N/A	Not overweight but crazy about eating	1	22kg, short for the breed (52cm)	Poor sense of smell	Aggressive towards certain people	Very curly coat	N/A	N/A	N/A	N/A	N/A	Hypothyroidism	5
GR09*	Female	5yr 9 months	N/A	Had problems learning tricks	N/A	N/A	Overweight for her size and gained weight easily. Had undergone metabolism tests (details of which were not reported), and while not treated, the results were considered borderline abnormal	3	30kg, short for the breed	N/A	N/A	N/A	N/A	N/A	N/A	N/A	N/A	N/A	1
GR10	Male	5yr	N/A	Mentally challenged according to owner	N/A	Not very interested in females, unlike the healthy male dog in the family.	Truncal obesity, ate everything, always hungry, on weight-controlling diet	4	32kg, short for the breed	N/A (sniffing a lot and loudly)	Introvert, did not go to foreign dogs	Curly, thin coat, lacks undercoat	N/A	N/A	N/A	N/A	N/A	N/A	4
*Downs et al 2014. N/A: information was not mentioned by the owner, #Confirmed by veterinarians in this study, FCI: Fédération Cynologique Internationale (World Canine Organisation).

## Sheet: Table S2
Table S2 List of dogs.
DogID	Breed	Status	Gender	Other information	OCT	Histopathology	RNAseq	RT-qPCR	FHC
GR01	Golden retriever	Affected	Male	35kg, intact	x	x
GR02	Golden retriever	Affected	Female	29kg, spayed	x		x	x	x
BE01	Beagle	Unaffected	Female	7 years old	x
LR01	Labrador retriever	Unaffected	Female	5 years old	x
RW01	Rottweiler	Unaffected	N/A	3 year old		x
BE02	Beagle	Unaffected	Female	12 year old			x	x
LR02	Labrador retriever	Unaffected	Female	12 year old				x
GS01	German shepherd	Unaffected	Female	12 year old			x	x
GSP01	German spaniel	Unaffected	Male	10 year old					x
N/A: information not available, OCT: optical coherence tomography, FHC: fluorescence histochemistry.

## Sheet: Table S3
Table S3 Macroscopic and microscopic examination.
	Affected male (GR01)			Affected female (GR02)
Tissue/organ	Macroscopic examination	Microscopic examination	Morphologic diagnosis	Macroscopic examination	Microscopic examination	Morphologic diagnosis
Adrenals	N/A	N/A	N/A	X	N/A	Multiple nodular cortical hyperplasia
Body	X	NA	BCS 9/9 (obese), perceived low withers height, deviating head shape	X	N/A	BCS 7/9 (heavy)
Brain, cerebrum	X	X	Unremarkable	X	X	Unremarkable
Coat	X	X	Focal acral lick dermatitis on tail, multiple crusts on torso	X	N/A	Unremarkable
Epididymides	X	X	Unremarkable	N/A	N/A	N/A
Eyes	X	X	Retinal degeneration	X	X	Retinal degeneration
Heart	X	X	Myxomatous valvular degeneration (mild)	X	X	Unremarkable
Joints	X	NA	Chronic osteoarthritis, coxal joint (dx), cubital joints (sin- mild), tibiotarsal joint (dx- mild)	X	N/A	Chronic osteoarthritis, cubital joints, genual joints (mild)
Kidneys	X	X	Renal dysplasia-like lesion right kidney, multiple chronic infarcts left kidney*	X	X	Chronic glomerulonephritis (mild)
Large intestine	N/A	N/A	N/A	X	X	Unremarkable
Liver	X	X	Unremarkable	X	X	Unremarkable
Lungs	X	X	Subpleural osteomas	X	X	Unremarkable
Mesenteric lymph node	N/A	N/A	N/A	X	X	Unremarkable
Nasal conchae	X	X	Unremarkable	X	X	Unremarkable
Oral cavity	X	X	Diastema, gingival hyperplasia, lack of multiple teeth (107, 108, 206, 207, 302, 305, 306, 307, 308, 407, 408)	X	N/A	Diastema, gingival hyperplasia
Pituitary gland	X	X	Unremarkable	X	X	Focal pituitary gland cyst
Prostate	X	X	Benign prostate hyperplasia (mild), chronic prostatitis (mild)	N/A	N/A	N/A
Small intestine	N/A	N/A	N/A	X	X	Chronic enteritis (mild)
Spleen	X	X	Multiple nodular hyperplasia, 0,3-4cm	N/A	N/A	N/A
Stomach	N/A	N/A	N/A	X	X	Unremarkable
Testes	X	X	Leydig cell tumor (sin), 10x5x5mm	N/A	N/A	N/A
Thyroids	X	X	Unilateral focal nodular hyperplasia	X	X	Unremarkable
N/A not applicaple or not available *Chronic infarcs in the left kidney could not be confirmed histologically

## Sheet: Table S4
Table S4 Marker gene expression.
Marker gene	ENSEMBL_id_build100	Gene description	Cell-type	GR02 (TPM)	BE02 (TPM)	GS01 (TPM)	Reference
PDE6A	ENSCAFG00000018251	phosphodiesterase 6A	Rod	0.279248	191.825	172.94	Kaewkhaw et al. (2015), Nordström et al. (2004)
PDE6B	ENSCAFG00000016782	phosphodiesterase 6B	Rod	0.149714	15.1087	6.25125	Kaewkhaw et al. (2015), Nordström et al. (2004)
CNGB1	ENSCAFG00000008588	cyclic nucleotide gated channel subunit beta 1	Rod	0.384123	22.9197	5.79614	Kaewkhaw et al. (2015), Chakraborty et al. (2016), Winkler et al. (2013)
GNAT1	ENSCAFG00000010764	G protein subunit alpha transducin 1	Rod	3.76199	333.5	123.508	Kaewkhaw et al. (2015), Downes and Gautam (1999)
CNGA1	ENSCAFG00000001917	cyclic nucleotide gated channel subunit alpha 1	Rod	2.04973	156.74	145.054	Kaewkhaw et al. (2015)
		Average	Rod	1.32496	144.019	90.7097
ARR3	ENSCAFG00000016791	arrestin 3	Cone	33.9183	177.123	32.1416	Kaewkhaw et al. (2015), Renninger et al. (2011)
GUCA1C	ENSCAFG00000010299	guanylate cyclase activator 1C	Cone	8.25931	23.4541	10.5736	Kaewkhaw et al. (2015), Kim et al. (2019)
PDE6C	ENSCAFG00000007908	phosphodiesterase 6C	Cone	2.54091	2.89838	1.73565	Kaewkhaw et al. (2015), Nordström et al. (2004)
PDE6H	ENSCAFG00000012874	phosphodiesterase 6H	Cone	226.364	578.428	352.278	Kaewkhaw et al. (2015), Kohl et al. (2012)
OPN1LW	ENSCAFG00000019441	opsin 1 (cone pigments), long-wave-sensitive	Cone	17.306	23.0135	0.58206	Kaewkhaw et al. (2015), Terakita (2005), Mowat et al. (2008)
		Average	Cone	57.6777	160.983	79.4621
ONECUT1	ENSCAFG00000015867	one cut homeobox 1	HC	0.953536	0.246841	0.253258	Siegert et al. (2012)
SEPTIN4	ENSCAFG00000017532	septin 4	HC	175.687	160.759	4.41907	Siegert et al. (2012)
TPM3	ENSCAFG00000017311	tropomyosin 3	HC	65.2074	78.2581	45.9822	Siegert et al. (2012)
NDRG1	ENSCAFG00000001141	N-myc downstream regulated 1	HC	54.0265	113.599	33.6578	Siegert et al. (2012)
SEPTIN7	ENSCAFG00000003216	septin 7	HC	67.6078	33.7989	3.84849	Macosko et al. (2015)
		Average	HC	72.6965	77.3325	17.6322
VSX2	ENSCAFG00000016913	visual system homeobox 2	BC	29.3882	13.0313	10.8678	Shekhar et al. (2016)
ISL1	ENSCAFG00000018449	ISL LIM homeobox 1	BC	16.1245	7.15688	4.5584	Shekhar et al. (2016)
GRM6	ENSCAFG00000000332	glutamate metabotropic receptor 6	BC	12.022	3.75662	0.314225	Shekhar et al. (2016)
OTX2	ENSCAFG00000015216	orthodenticle homeobox 2	BC	10.2914	11.7608	4.58541	Shekhar et al. (2016)
TRPM1	ENSCAFG00000010306	transient receptor potential cation channel subfamily M member 1	BC	79.0198	35.7553	29.176	Shekhar et al. (2016)
		Average	BC	29.3692	14.2922	9.90037
GAD1	ENSCAFG00000012560	glutamate decarboxylase 1	AC	6.61969	6.1365	1.12297	Cherry et al. (2009)
GAD2	ENSCAFG00000004299	glutamate decarboxylase 2	AC	2.31487	1.08802	0.162953	Macosko et al. (2015)
SLC6A1	ENSCAFG00000005033	solute carrier family 6 member 1	AC	13.116	11.9665	12.3481	Macosko et al. (2015)
ATP1B1	ENSCAFG00000015258	ATPase Na+/K+ transporting subunit beta 1	AC	60.0713	46.9297	24.1545	Macosko et al. (2015)
TFAP2B	ENSCAFG00000002156	transcription factor AP-2 beta	AC	31.3489	17.3359	22.8112	Cherry et al. (2009)
		Average	AC	22.6941	16.6913	12.1199
NEFL	ENSCAFG00000009014	neurofilament light	RGC	79.826	61.8596	13.9492	Ruiz-Ederra et al. (2004)
RBPMS	ENSCAFG00000006503	RNA binding protein, mRNA processing factor	RGC	18.3923	9.12184	3.71194	Rodriguez et al. (2014)
SLC17A6	ENSCAFG00000010093	solute carrier family 17 member 6	RGC	5.31016	2.25324	0.442327	Fremeau et al. (2004)
THY1	ENSCAFG00000029265	Thy-1 cell surface antigen	RGC	11.6836	10.9601	7.39083	Barnstable and Dräger (1984)
POU4F2	ENSCAFG00000007756	POU class 4 homeobox 2	RGC	0.082482	0.347738	0.060421	Erkman et al. (1996)
		Average	RGC	23.0589	16.9085	5.11095
GNAI2	ENSCAFG00000010740	G protein subunit alpha i2	MG	92.3226	52.0575	26.1121	Kaewkhaw et al. (2015)
SLC1A3	ENSCAFG00000018704	solute carrier family 1 member 3	MG	114.129	36.1272	38.4906	Rauen et al. (1998)
GLUL	ENSCAFG00000013102	glutamate-ammonia ligase	MG	163.384	176.439	224.042	Roesch et al. (2008), Kaewkhaw et al. (2015)
CLU	ENSCAFG00000008404	clusterin	MG	1477.28	299.157	229.233	Roesch et al. (2008)
GFAP	ENSCAFG00000013973	glial fibrillary acidic protein	MG	279.425	18.5189	8.82131	Chen & Weber (2002)
		Average	MG	425.308	116.46	105.34
RPE65	ENSCAFG00000020431	retinoid isomerohydrolase RPE65	RPE	42.0142	4.33956	5.87645	Carr et al. (2011)
BEST1	ENSCAFG00000015909	bestrophin 1	RPE	16.7593	3.83991	0.457555	Carr et al. (2011)
PMEL	ENSCAFG00000000080	premelanosome protein	RPE	12.5817	1.79315	0.38679	Carr et al. (2011)
RGR	ENSCAFG00000015930	retinal G protein coupled receptor	RPE	117.188	124.663	68.2345	Carr et al. (2011)
EZR	ENSCAFG00000000661	ezrin	RPE	13.205	5.9897	3.9647	Erkman et al. (1996)
		Average	RPE	40.3496	28.1252	15.784
Rod: rod photoreceptor, cone: cone photoreceptor, HC: horizontal cell, BC: bipolar cell, AC: amacrine cell, RGC: retinal ganglion cell, MG: macroglia, RPE: retinal pigment epithelium, TPM: transcripts per million.

## Sheet: Table S5
Table S5 Primers.
Forward primer	Fwd_sequence 5' to 3'	Reverse primer	Rev_sequence 5' to 3'	Product size (bp)
Cfa_TTC8_E7-8_F	TTTGGACTTGGCTGCCCTTT	Cfa_TTC8_E7-8_R	CATTTCCTGCTGCTTGAGGG	145
Cfa_TTC8_E13-14_F	AACAATAACCACGCTGAGGC	Cfa_TTC8_E13-14_R	ATGGGGTGCCAAAGATGATG	111
Cfa_RHO_E3E4_F	TGCTCATGTGGGATCGACTA	Cfa_RHO_E3E4_R	CACCCAGCAGATCAGGAAAG	246
Cfa_RPE65_E13E14_F	TGCAAGCTGAACGTCAAGAC	Cfa_RPE65_E13E14_R	AATCTCCACTTCAGCCCTGG	219
Cfa_BRN3A-POU4F1_E1E2_F	CTCCCTGAGCACAAGTACCC	Cfa_BRN3A-POU4F1_E1E2_R	CGCTGTTCATCGTGTGGTAC	214
Cfa_OPN1SW_E3E4_F	TGCTTCTCCTACTTGCAGCT	Cfa_OPN1SW_E3E4_R	TGACAAGCCGTAAGTCCAGT	208
Cfa_OPN1LW_E3E4_F	TTGCCTTCTCCTGGATCTGG	Cfa_OPN1LW_E3E4_R	ATGACGCTGAGTGGGATGAT	187
Cfa_GFAP_E3E4_F	AACCTGGCCAGTTATCGACA	Cfa_GFAP_E3E4_R	TCTCTTAGGGCTGCTGTGAG	209

## Sheet: Table S6
Table S6 Human TTC8 mutations.
BBS patient	Family	Mutation	Nt_changes	Aa_changes	Type of mutation	Position in GRCh38.p13	Variant_number	Zygosity	RP	Polydactyly	Obesity	Reproductive problems	Renal anomalies	Congnitive impairment	Secondary characteristics and other traits	Reference
1	family1	1	6 bp Inframe deletion	187–188delEY	non-frameshift indel	14:88,843,814-88,843,820	rs587777806, CD035491	hom	Yes	Yes	Yes	Hypogonadism	N/A	Speech impediment	Developmental delay, brachycephaly	Ansley et al. (2003)
2	family1	1	6 bp Inframe deletion	187–188delEY	non-frameshift indel	14:88,843,814-88,843,820	rs587777806, CD035491	hom	Yes	Yes	Yes	Hypogonadism	N/A	Speech impediment	Developmental delay, brachycephaly	Ansley et al. (2003)
3	family1	1	6 bp Inframe deletion	187–188delEY	non-frameshift indel	14:88,843,814-88,843,820	rs587777806, CD035491	hom	Yes	Yes	Yes	N/A	N/A	Speech impediment	Developmental delay, brachycephaly, deafness	Ansley et al. (2003)
4	family2	1	6 bp Inframe deletion	187–188delEY	non-frameshift indel	14:88,843,814-88,843,820	rs587777806, CD035491	hom	Yes	Yes	Yes	Hyposadias	N/A	Speech impediment	Developmental delay, brachycephaly	Ansley et al. (2003)
5	family2	1	6 bp Inframe deletion	187–188delEY	non-frameshift indel	14:88,843,814-88,843,820	rs587777806, CD035491	hom	Yes	Yes	Yes	N/A	N/A	Speech impediment	Developmental delay, brachycephaly, asthma	Ansley et al. (2003)
6	family3	2	IVS10 + 2_4delTGC	splice site	splice donor variant	14:88,870,200-88,870,202	rs587777807, CD035492	hom	Yes	Yes	Yes	Hypogonadism	N/A	Speech impediment	Developmental delay, brachycephaly	Ansley et al. (2003)
7	family3	2	IVS10 + 2_4delTGC	splice site	splice donor variant	14:88,870,200-88,870,202	rs587777807	hom	Yes	Yes	Yes	Hypogonadism	N/A	Speech impediment	Developmental delay, brachycephaly, situs inversus	Ansley et al. (2003)
8	family3	2	IVS10 + 2_4delTGC	splice site	splice donor variant	14:88,870,200-88,870,202	rs587777807	hom	Yes	Yes	Yes	Hypogonadism	N/A	Speech impediment	Developmental delay, brachycephaly, hemophilia	Ansley et al. (2003)
9	family4	3	c.459G>A	splice site	silent p.T163T, splice site	14:88,841,196	rs119103286, CS056439	hom	Yes	Yes	N/A	Micropenis	N/A	Congnitive impairment	N/A	Stoetzel et al. (2006)
10	family4	3	c.459G>A	splice site	silent p.T163T, splice site	14:88,841,196	rs119103286, CS056439	hom	Yes	Yes	N/A	Hydrometrocolpos	Progressive renal failure	N/A	N/A	Stoetzel et al. (2006)
11	family4	3	c.459G>A	splice site	silent p.T163T, splice site	14:88,841,196	rs119103286, CS056439	hom	Yes	Yes	N/A	N/A	Kidney dysplasia	N/A	N/A	Stoetzel et al. (2006)
12	family5	4	IVS6 + 1_G > A	splice site	splice donor variant	14:88,843,851	rs587777808, CS056440	hom	N/A	N/A	N/A	N/A	N/A	N/A	N/A	Stoetzel et al. (2006)
13	family6	5	IVS6 + 1–2_delGT	splice site	splice donor variant	14:88,843,850-88,843,852	rs1566839401, CD056477	het	N/A	N/A	N/A	N/A	N/A	N/A	N/A	Stoetzel et al. (2006)
14	family7	6	c.459+1G>A	P101LfsX12*	splice donor variant	14:88,841,197	CS063392	hom	N/A	N/A	N/A	N/A	N/A	N/A	N/A	Smaoui et al. (2006)
15	family8	6	c.459+1G>A	P101LfsX12*	splice donor variant	14:88,841,197	CS063392	hom	N/A	N/A	N/A	N/A	N/A	N/A	N/A	Smaoui et al. (2006)
16	family9	7	c.355_356insGGTGGAAGGCCAGGCA	T124RfsX43	complex variant	14:88,841,090-88,841,110	N/A	hom	N/A	N/A	N/A	N/A	N/A	N/A	N/A	Smaoui et al. (2006)
17	family10	8	c.122G>A	W41X	nonsense variant	14:88,839,459	CM102429	hom	Yes	Yes	Yes	Hypogonadism	No	N/A	Patient had secondary characteristics but details are unknown	Harville et al. (2010)
18	family11	9	IVS2 + 1_G > A	splice site	splice donor variant	14:88,839,573	rs139234943, CS111278	hom	Yes	Yes	Yes?	No	No	Yes	Nasal cephalocele, asthma	Janssen et al. (2011)
19	family12	10	c.485delG	G162fsX4	frameshift indel	14:88,841,450	CD111279	comp het	Yes	Yes	Yes	Hypogonadism	Yes	Yes	Fatty liver, gall stones	Janssen et al. (2011)
19	family12	11	c.1000delA	I334fsX1	frameshift indel	14:88,870,179	CD111280	comp het	Same patient as above							Janssen et al. (2011)
20	family13	12	c.329+1G>A	splice site	splice donor variant	14:88840929	CS127333	hom	N/A	N/A	N/A	N/A	N/A	N/A	N/A	Redin et al. (2012)
21	family14	6	c.459+1G>A	splice site	splice donor variant	14:88,841,197	CS063392	hom	Yes	Yes	Yes	Hypogonadism	Yes	N/A	Dental anomalies	M'hamdi et al. (2013)
22	family15	13	c.1347G>C	Q449H	missense p.Q449H, splice site	14:88,872,452	rs876661403, CM1515164	hom	Yes	Yes	Yes	Hypogonadism	No	Congnitive impairment	Clinodactyly	Ullah et al. (2017)
23	family15	13	c.1347G>C	Q449H	missense p.Q449H, splice site	14:88,872,452	rs876661403, CM1515164	hom	Yes	Yes	Yes	Hypogonadism	N/A	Congnitive impairment	Clinodactyly	Ullah et al. (2017)
24	family15	13	c.1347G>C	Q449H	missense p.Q449H, splice site	14:88,872,452	rs876661403, CM1515164	hom	Yes	Yes	Yes	N/A	No	Congnitive impairment	N/A	Ullah et al. (2017)
25	family16	14	c.226C>T	Q76X	nonsense, splice site	14:88,824,819	N/A	comp het	Yes	Yes	Yes	No	Yes	No	Exotropia, hypertension, Hirschsprung disease, abnormal glucose tolerance	Sato et al. (2019)
25	family16	15	c.309_310insAT	T103fs	frameshift indel	14:88,841,045-88,841,047	N/A	comp het	Same patient as above							Sato et al. (2019)
nsRP	N/A	16	IVS1-2A>G	splice site	splice acceptor variant	14:88,833,691	rs587777809	hom	nsRP							Riazuddin et al. (2010)
nsRP	N/A	13	c.1347G>C	Q449H	missense p.Q449H, splice site	14:88,872,452	rs876661403, CM1515164		nsRP							Goyal et al. (2016)
*Conflicting coding and protein position, nsRP: Nonsyndromic retinitis pigmentosa, indel: insertion/deletion, hom: homozygous, het: heterozygous, comp het: compound heterozygous, RP: retinitis pigmentosa, N/A: not applicaple or not available
Nucleotide (nt) and amino acid (aa) changes are as provided by the authors in the respective publications. When possible, reference SNP (rs) ID and/or The Human Gene Mutation Database (HGMD) identifier numbers are given.
